# Supplementary material for: Laser-equipped gas reaction chamber for probing environmentally sensitive materials at near atomic scale
Source: PLOS journal article supplement (doi:10.1371/journal.pone.0262543), 2022-02-09
Supplement: S4 (10.1371/journal.pone.0262543.s004) [file journal.pone.0262543.s004]

## Lift-out with Focused ion beam for Reacthub applications

The procedure as shown by Fig S4, starting from protecting the region of interest (ROI) with electron-beam- and ion-beam-deposited Pt capping layers and making trenches each side (Fig S4(a)), lifting out the made lamella (Fig S4(b)), mounting a part of the lamella upon one of the three prepared conical mounts on a pre-processed Reacthub grid (Fig S4(c)), and finally milled down to an appropriate shape for an atom probe specimen (Fig S4(d)).

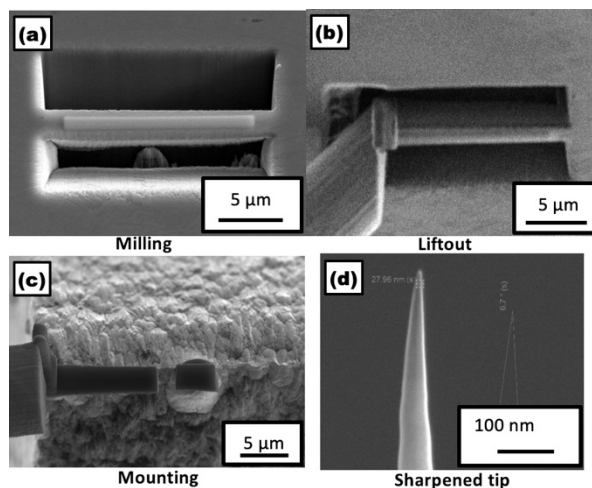

**Fig S4. Focused ion beam liftout protocol for atom probe samples (a-c)** Site specific liftout procedure for preparing APT tip for D gas charging on the high manganese TWIP steel. (a) A lamella from a sample is cut. (b) The lamella was then lifted out using a micromanipulator and is (c) welded to the mounting grid. (d) The sample is then milled down to appropriate atom probe sample dimensions (<100-nm end radius).
